# Supplementary material
Source: publisher figshare collection journal article supplement (https://acs.figshare.com/ndownloader/files/26542133)
Supplement: Supplementary file 1 [file 26542133]

## Supporting information

### **High Energy Efficiency and Thermal Stability of BaTiO<sub>3</sub>-BiScO<sub>3</sub> Thin Films Based on Defects Engineering**

Waseem Abbas, Derek Ho<sup>\*,2</sup> and Abhijit Pramanick<sup>\*,1</sup>

Department of Materials Science and Engineering, City University of Hong Kong, Hong Kong, China

<sup>\*,1</sup> [apramani@cityu.edu.hk](mailto:apramani@cityu.edu.hk), <sup>\*,2</sup> [derekho@cityu.edu.hk](mailto:derekho@cityu.edu.hk)

# I. Transmission Electron Microscope (TEM) image of film cross-section

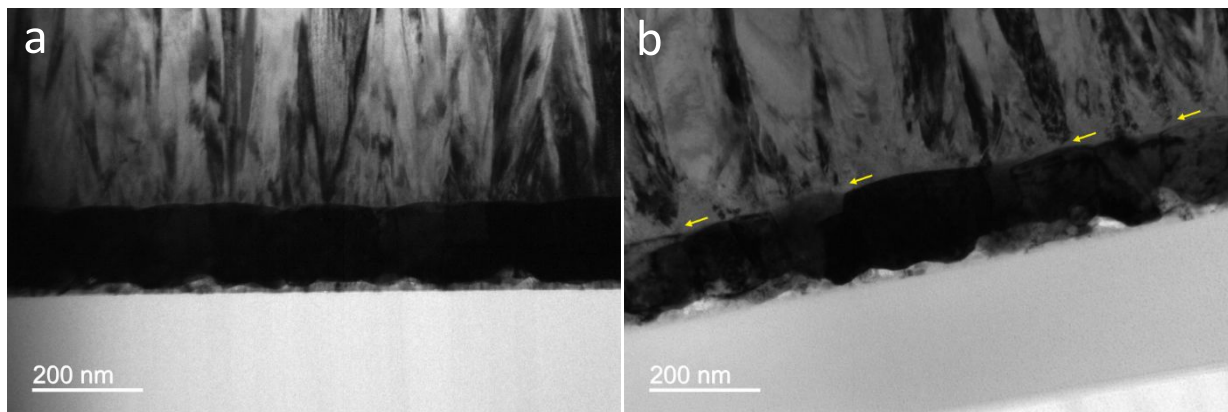

Figure S1: Representative bright-field images of the cross-section of the BSBT/Pt interface of the film deposited at (a) 550 °C and (b) 510 °C. The yellow arrows indicate likely localized amorphous phase for film deposited at 510 °C

## II. X-ray photoelectron spectroscopy (XPS) data for 10BSBT and 15BSBT films

10BSBT film

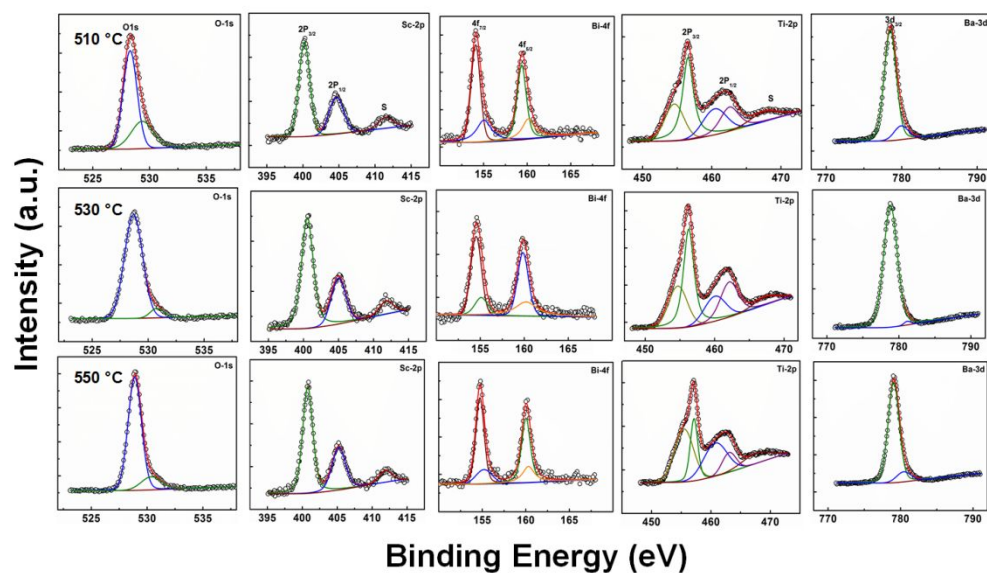

15BSBT film

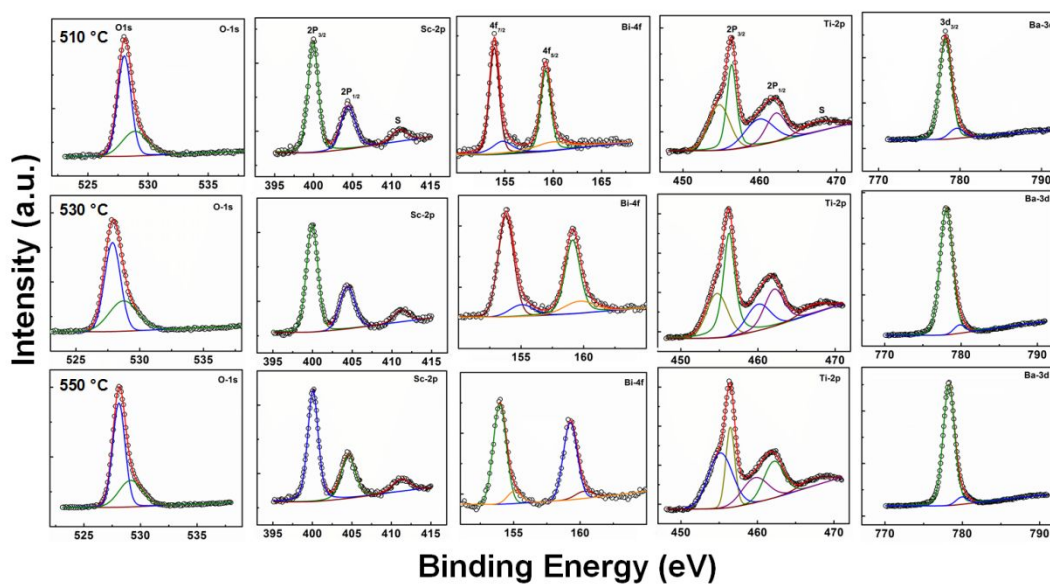

Figure S2: XPS spectra measured for 10BSBT and 15BSBT films

### III. Changes in $hkl$ lattice spacing with $T_d$ for the 15BSBT film

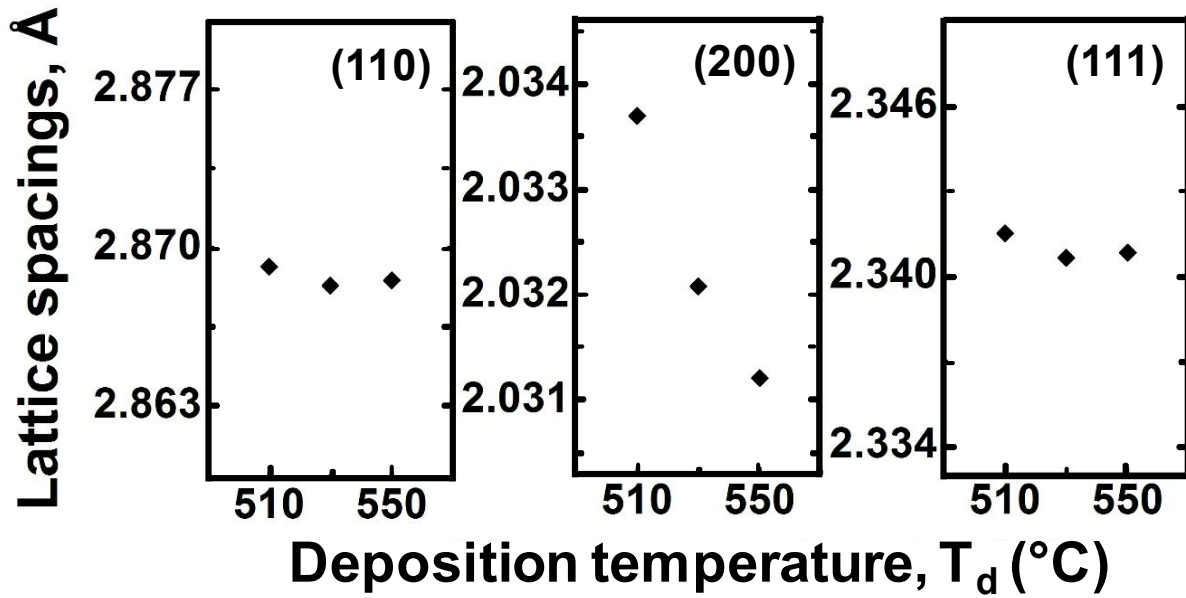

Figure S3: Changes in  $(hkl)$  lattice spacing of the 15BSBT thin films as a function of deposition temperature  $T_d$ . The (200) lattice spacing decreases more with increase in  $T_d$ , as compared to (110) and (111) lattice spacing, which indicates that vacancies induce non-cubic distortions in the crystal lattice.<sup>1</sup>

Supplementary reference:

- [S1] W. Abbas, D. Ho and A. Pramanick, High Energy Storage Efficiency and Thermal Stability of A-site-deficient and 110-textured BaTiO<sub>3</sub>-BiScO<sub>3</sub> Thin Films. *J. Am. Ceram. Soc.*, **2020**, *103*, 3168-3177.
